# Supplementary material
Source: Springer Nature journal article supplement (https://www.springermedizin.de/resource/supplementary/13054_2009_8509_MOESM6_ESM.pdf/9732126)

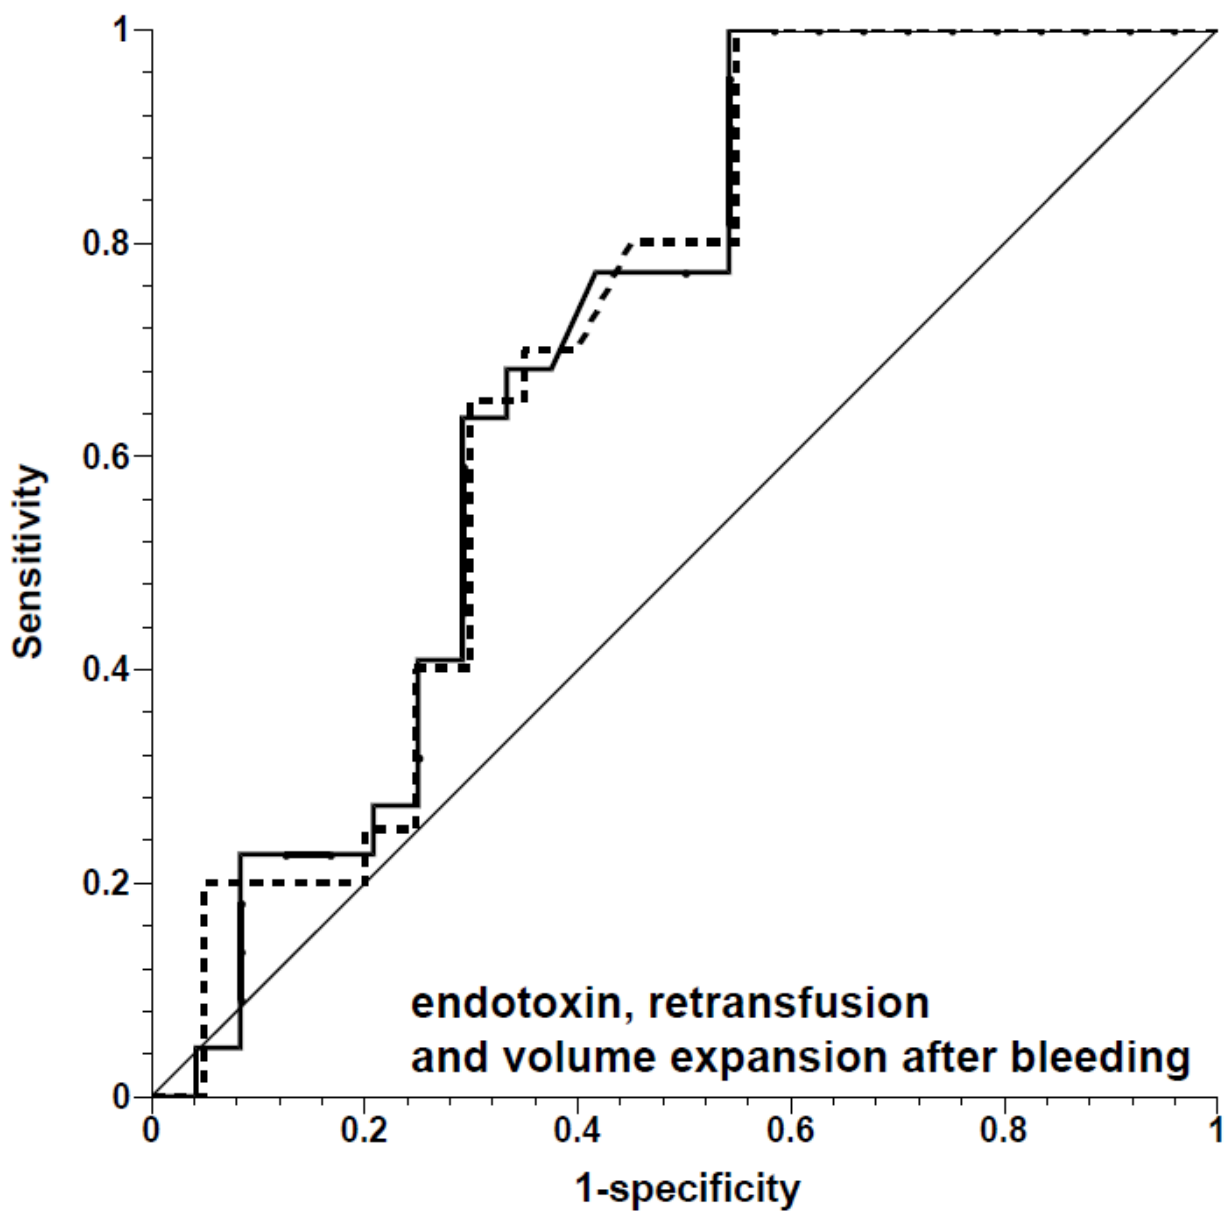

Supplement: MOESM6 [file 9732126]
